# Supplementary material
Source: ML conference proceedings conference paper supplement (https://openaccess.thecvf.com/content/CVPR2025/html/Amrani_Sample-_and_Parameter-Efficient_CVPR_2025_paper.html)
Supplement: Supplementary file 1 [file Amrani_Sample-_and_Parameter-Efficient_CVPR_2025_supplemental.pdf]

# Sample- and Parameter-Efficient Auto-Regressive Image Models

## Supplementary Material

### 10. Benchmark Datasets

| Dataset          | train     | test   | classes |
|------------------|-----------|--------|---------|
| Imagenet-1k [22] | 1,281,167 | 50,000 | 1000    |
| iNAT-18 [46]     | 437,513   | 24,426 | 8142    |
| CIFAR-10 [34]    | 50,000    | 10,000 | 10      |
| CIFAR-100 [34]   | 50,000    | 10,000 | 100     |
| Food101 [9]      | 75,750    | 25,250 | 101     |
| DTD [21]         | 3,760     | 1,880  | 47      |
| Pets [36]        | 3,680     | 3,669  | 37      |
| Cars [33]        | 8,144     | 8,041  | 196     |
| iWildCam [8]     | 129,809   | 14961  | 182     |
| Camelyon17 [5]   | 302,436   | 34904  | 2       |
| PCAM [47]        | 262,144   | 32768  | 2       |
| RxRx1 [42]       | 40,612    | 9854   | 1139    |
| EuroSAT [30]     | 16,200    | 5400   | 10      |
| fMoW [20]        | 76,863    | 19915  | 62      |
| Infograph [37]   | 36,023    | 15,582 | 345     |

Table 7. **Evaluation benchmarks.** We provide the references, the number of images in the train and test sets, and the number of categories of all the 15 recognition benchmarks used in this work. Table taken from [26].

### 11. Computational Cost Estimation

In Table 8, we *estimate* the computational cost of each method using the following simplified formula:

$$\text{Cost} = \text{Parameters} \times \text{Samples} \times \text{Epochs} \times \text{Views}^2 \times \text{Tokens}^2 \quad (2)$$

This formula provides an approximate scaling relationship rather than an exact measurement, as it does not account for hardware optimizations, model-specific efficiencies, or parallelization effects.

- **Parameters (Linear):** The number of parameters in the model determines the size of weight matrices involved in computation. Since most architectures perform matrix multiplications that scale with the number of parameters, computation cost is approximately proportional to this term.
- **Samples (Linear):** The number of training samples contributes linearly since each sample requires a forward and backward pass.
- **Epochs (Linear):** The number of epochs scales cost linearly because training for more epochs means repeating the entire dataset multiple times.
- **Views (Squared):** If a method processes multiple views of the same data (e.g., contrastive learning with augmentations), the

| Name | Parameters | Samples | Epochs | Views | Tokens | Cost    | Acc. |
|------|------------|---------|--------|-------|--------|---------|------|
| DINO | 85M        | 1.2M    | 800    | 2     | 768    | 19.2e22 | 75.0 |
| iBOT | 307M       | 1.2M    | 250    | 2     | 196    | 1.4e22  | 77.6 |
| BEiT | 307M       | 14M     | 150    | 1     | 256    | 4.2e22  | 65.4 |
| MAE  | 632M       | 1.2M    | 1600   | 1     | 256    | 8.0e22  | 75.3 |
| AIM  | 632M       | 2B      | 2.5    | 1     | 256    | 20.7e22 | 75.6 |
| XTRA | 632M       | 14M     | 100    | 1     | 256    | 5.8e22  | 76.2 |

Table 8. **Computational cost comparison.**

computational cost increases quadratically. This is because each pairwise interaction between views often involves computing similarities or attention across all view combinations.

- **Tokens (Squared):** The number of tokens per sample affects cost quadratically because self-attention mechanisms in transformers require  $\mathcal{O}(\text{Tokens}^2)$  operations per forward pass.

For clarity, the numbers reported in Table 3 are divided by  $10^{22}$ , as the absolute units of computation do not impact the relative comparisons between methods.

While this formula captures key scaling behaviors, it does not precisely reflect real-world training cost due to factors like activation memory usage, hardware acceleration, and mixed precision training. Nonetheless, it serves as a useful proxy for comparing methods at scale.

Compared to MAE, AIM, and DINO, XTRA demonstrates greater effectiveness. While BEiT is slightly more efficient, XTRA outperforms it by +10.8% in accuracy. iBOT, which integrates contrastive learning with masked image modeling, achieves better accuracy at a lower computational cost.
